# Supplementary material for: 5-FU resistant EMT-like pancreatic cancer cells are hypersensitive to photochemical internalization of the novel endoglin-targeting immunotoxin CD105-saporin
Source: Springer Nature journal article supplement (doi:10.1186/s13046-017-0662-6), 2017-12-01

**A**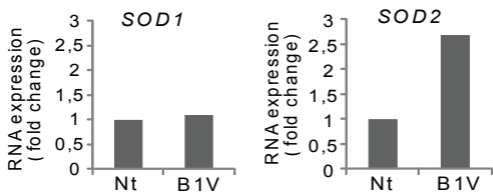**B**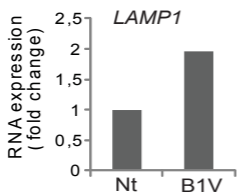**C**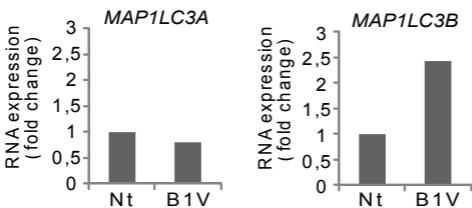**D**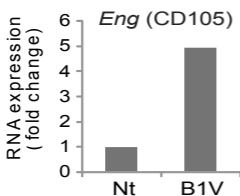

Supplement: MOESM1 [file 15319796]
